# Supplementary material
Source: publisher figshare collection journal article supplement (https://brill.figshare.com/ndownloader/files/20778045)
Supplement: Supplementary file 1 [file 20778045]

*Multisensory Research*

**Multisensory Interactions in Virtual Reality: Optic flow reduces vestibular sensitivity, but only for congruent planes of motion**

**Maria Gallagher, Reno Choi and Elisa Raffaella Ferrè** *

Royal Holloway, University of London, Egham, UK

Received 10 June 2019; accepted 2 December 2019

* To whom correspondence should be addressed. E-mail: e.ferre@rhul.ac.uk

**Supplementary Material**
